# Supplementary material for: Atg6/UVRAG/Vps34-Containing Lipid Kinase Complex Is Required for Receptor Downregulation through Endolysosomal Degradation and Epithelial Polarity duringDrosophilaWing Development
Source: Hindawi journal article supplement (doi:10.1155/2014/851349), 2014-01-01

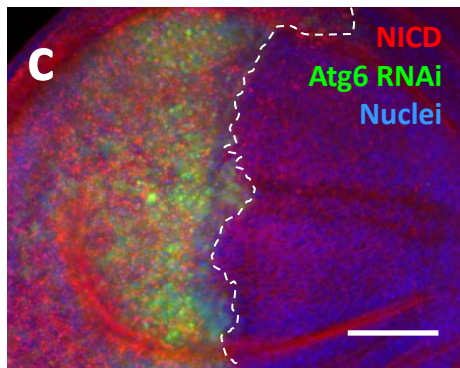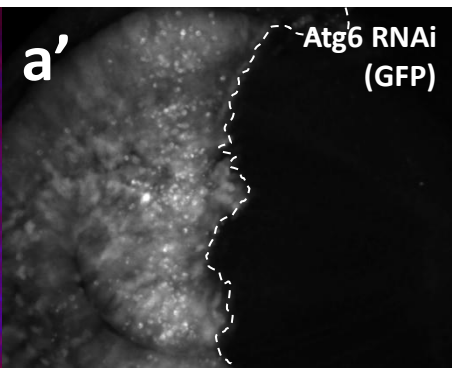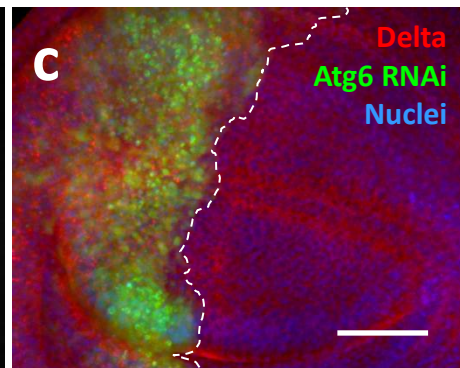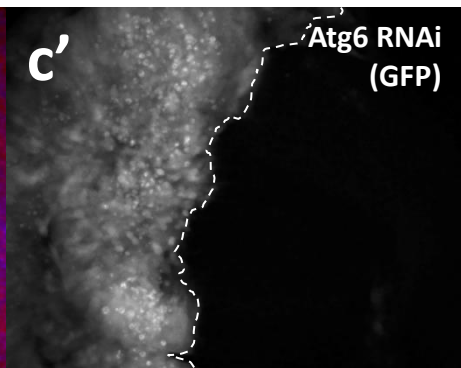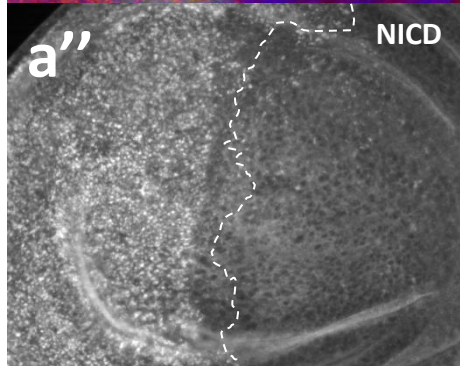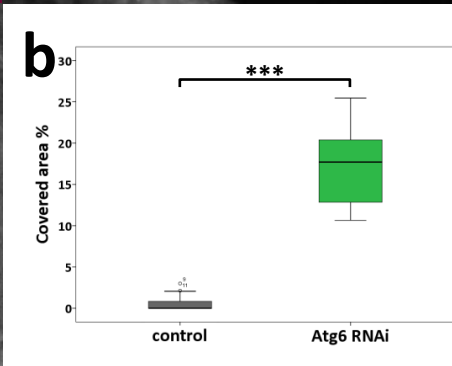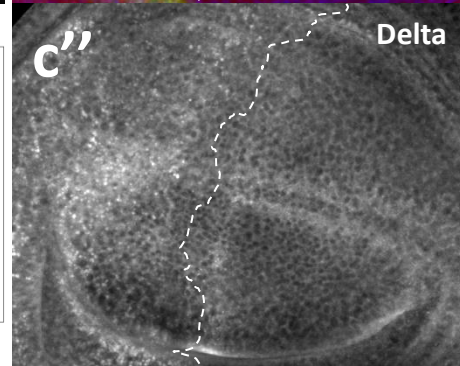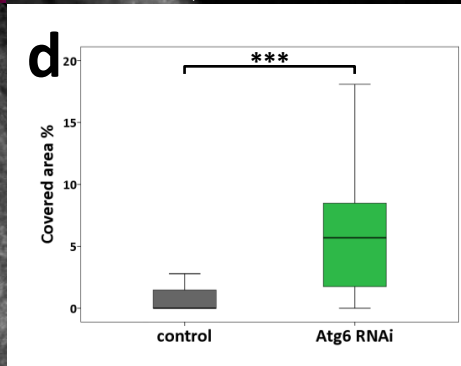

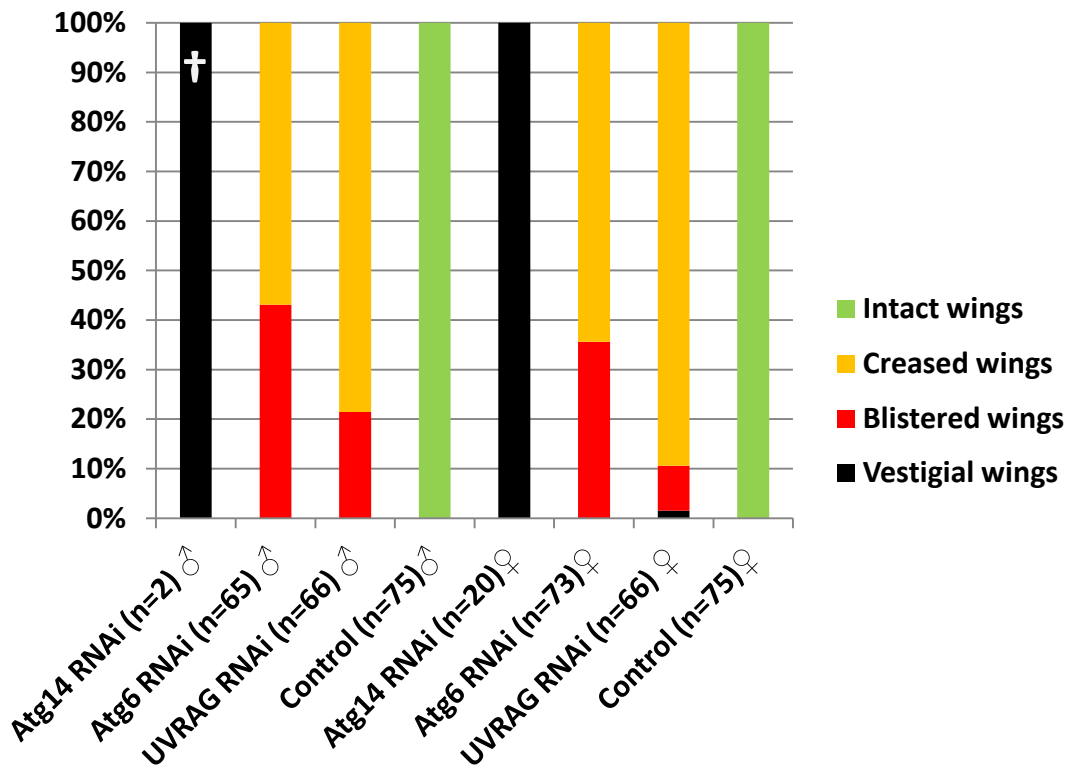

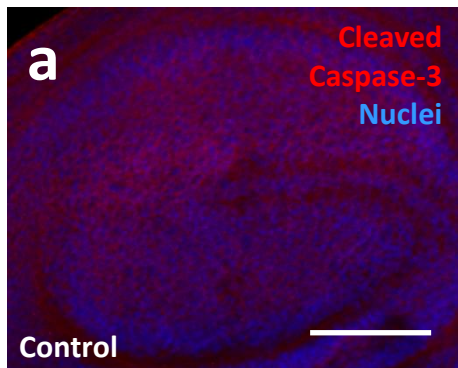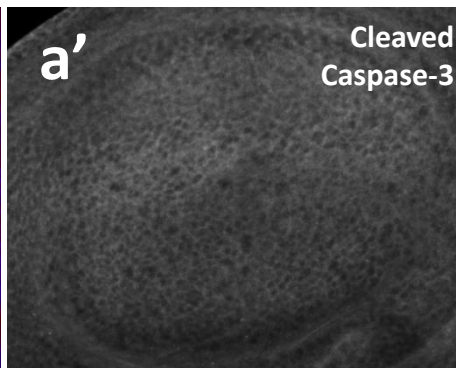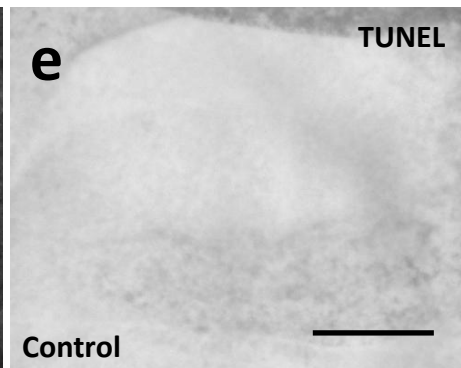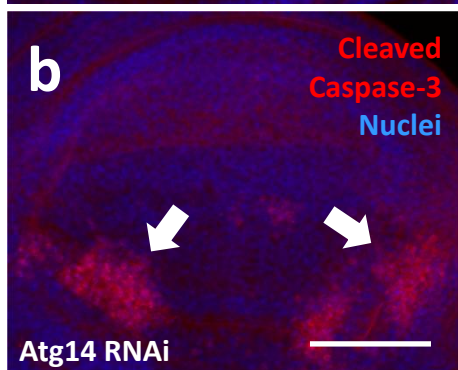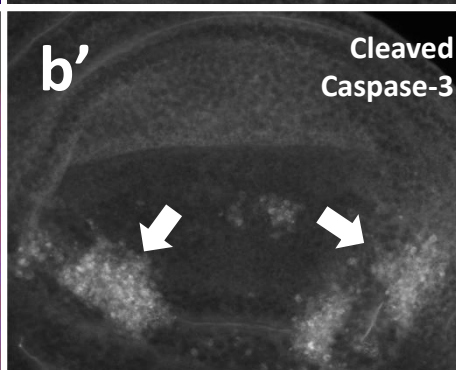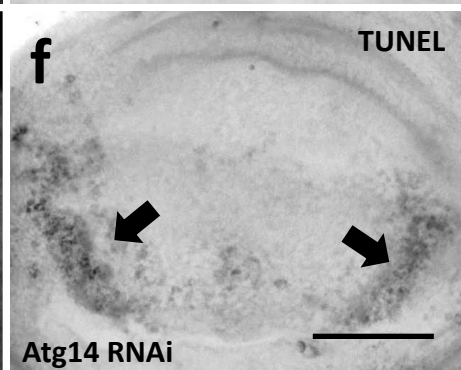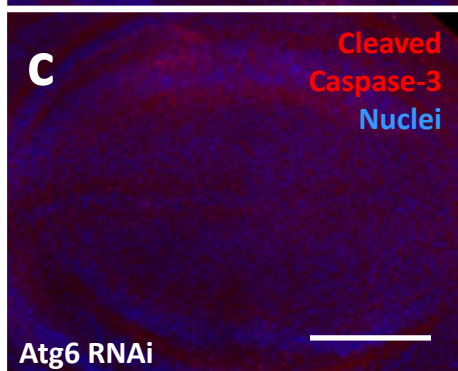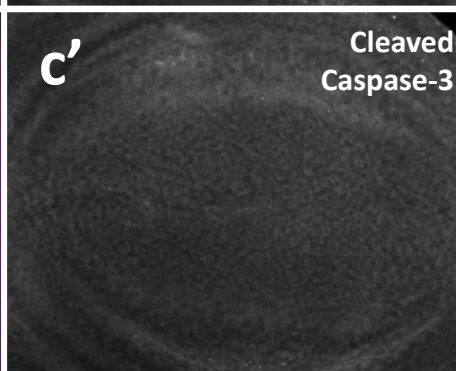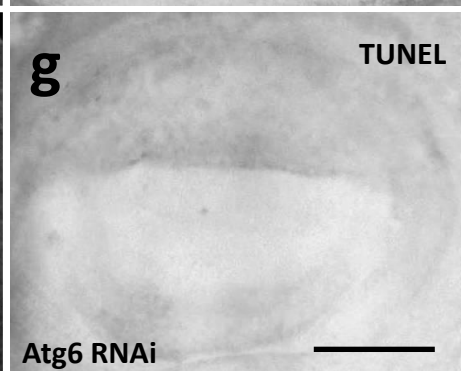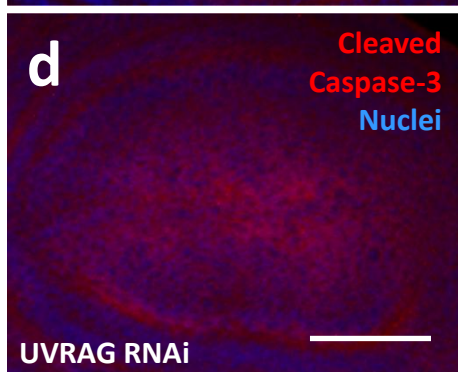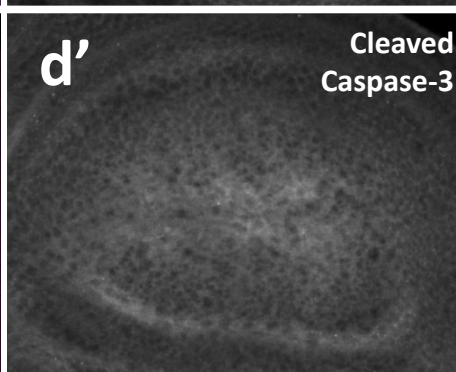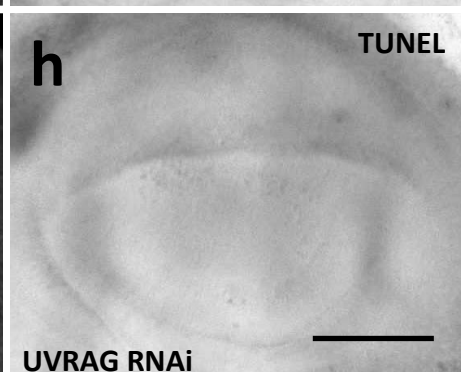

Supplement: f2 [file 851349.f2.pdf]
