# Supplementary material for: Atg6/UVRAG/Vps34-Containing Lipid Kinase Complex Is Required for Receptor Downregulation through Endolysosomal Degradation and Epithelial Polarity duringDrosophilaWing Development
Source: Hindawi journal article supplement (doi:10.1155/2014/851349), 2014-01-01
Supplement: f1 [file 851349.f1.pdf]

Table S1. Fly stocks used in this study. (BDSC:Bloomington Drosophila Stock Center, VDRC:Vienna Drosophila RNAi Center)

| Stock name                                    | Source [reference]     | Stock ID |
|-----------------------------------------------|------------------------|----------|
| Atg6 <sup>1</sup>                             | EH. Baechrecke [1]     |          |
| UAS-Atg6-myc                                  | EH. Baechrecke [1]     |          |
| UAS-GFP-2xFYVE                                | M. Gonzalez-Gaitan [2] |          |
| tubRab4-YFP                                   | S. Eaton [3]           |          |
| tubRab11-YFP                                  | S. Eaton [3]           |          |
| tubRab5-CFP, tubRab7-YFP                      | T. Klein [4]           |          |
| UAS-Lamp1-GFP                                 | H. Krämer [5]          |          |
| tubLamp1-GFP                                  | H. Krämer [5]          |          |
| CathD-mCherry                                 | G. Juhasz [6]          |          |
| ptcGal4,UAS-myc,UAS-mCherry-Atg8              | G. Juhasz [7]          |          |
| MsGal4                                        | BDSC                   | 8860     |
| MsGal4;UAS-Dcr-2                              | BDSC                   | 25706    |
| UAS-Atg6-RNAi                                 | BDSC                   | 28060    |
| UAS-UVRAG-RNAi                                | BDSC                   | 34368    |
| UAS-Atg14-RNAi                                | VDRC                   | 108559   |
| UAS-Vps34-RNAi                                | VDRC                   | 100296   |
| UAS-Vps15-RNAi                                | BDSC                   | 34092    |
| UAS-Atg8a-RNAi                                | BDSC                   | 28989    |
| UAS-N                                         | BDSC                   | 26820    |
| UAS-Hrp-CD2                                   | BDSC                   | 8763     |
| UAS-Clc-GFP                                   | BDSC                   | 7107     |
| UAS-FLP                                       | BDSC                   | 4539     |
| FRT82B,ubiGFP,Minute(RpS3 <sup>Plac92</sup> ) | BDSC                   | 5627     |
| FRT82B,ubiGFP                                 | BDSC                   | 32655    |
| FRT82B                                        | BDSC                   | 2035     |
| hsFLP                                         | BDSC                   | 8862     |
| UAS-Dcr-2;enGal4,UAS-EGFP                     | BDSC                   | 25752    |
| enGal4                                        | BDSC                   | 30564    |
| enGal4,RFP                                    | BDSC                   | 30557    |
| UAS-Dcr-2;enGal4,UAS-myrRFP,NRE-EGFP          | BDSC                   | 30730    |

Table S2. Antibodies used in this study. (DSHB:Developmental Studies Hybridoma Bank, IHC: immunohistochemistry, IEM: immunoelectron microscopy, TA:traffic assay)

| <b>Antibody</b>                       | <b>Application and dilution</b> | <b>Source</b>                       |
|---------------------------------------|---------------------------------|-------------------------------------|
| mouse anti-Flamingo                   | IHC: 1:50                       | DSHB: Flamingo #74                  |
| mouse anti-Armadillo                  | IHC: 1:100                      | DSHB: N2 7A1 ARMADILLO              |
| mouse anti-Fasciclin III              | IHC: 1:100                      | DSHB: 7G10 anti-Fasciclin III       |
| rat anti-Cadherin                     | IHC: 1:100                      | DSHB: DCAD2                         |
| mouse anti-Discs large                | IHC: 1:100                      | DSHB: 4F3 anti-discs large          |
| mouse anti- $\beta$ -integrin         | IHC: 1:80                       | DSHB: CF.6G11                       |
| rabbit anti-GFP                       | IHC: 1:800, IEM: 1:100          | Abcam: ab290-50                     |
| mouse anti-Notch extracellular domain | IHC: 1:100 TA: 1:25             | DSHB: C458.2H                       |
| mouse anti-Notch intracellular domain | IHC: 1:100                      | DSHB: C17.9C6                       |
| mouse anti-Delta extracellular domain | IHC: 1:100                      | DSHB: C594.9B                       |
| mouse anti-Wingless                   | IHC: 1:100                      | DSHB: 4D4                           |
| rabbit anti-p62                       | IHC: 1:2000                     | G.Juhasz [8]                        |
| rat anti-mCherry                      | IHC: 1:300                      | G. Juhasz [7]                       |
| rabbit anti-Cleaved Caspase-3         | IHC: 1:300                      | Cell Signaling Technology®: #9661   |
| Sheep anti-Digoxigenin-AP conjugate   | TUNEL: 1:4000                   | Roche: 11093274910                  |
| DyLight®594 horse anti-Mouse          | IHC: 1:500                      | Vector: DI-2594                     |
| DyLight®594 goat anti-Rabbit          | IHC: 1:500                      | Vector: DI-1594                     |
| Alexa Fluor®488 goat anti-Mouse       | IHC: 1:500                      | Invitrogen: A11001                  |
| Alexa Fluor®488 goat anti-Rabbit      | IHC: 1:500                      | Invitrogen: A11008                  |
| Alexa Fluor®568 goat anti-Rat         | IHC: 1:500                      | Invitrogen: A11077                  |
| 18nm gold-conjugated goat anti-Rabbit | IEM: 1:100                      | Jackson ImmunoResearch: 111-215-144 |

Table S3. Statistics

| Figure                      | Group            | N  | Mean    | SD     | P-value  | Test and post hoc                                                                                                                                                          |
|-----------------------------|------------------|----|---------|--------|----------|----------------------------------------------------------------------------------------------------------------------------------------------------------------------------|
| Fig. 2a-e<br>GFP-FYVE       | control          | 30 | 8.2510  | 3.0501 | P<0.0001 | Kruskal-Wallis test<br>(ctrl-Atg6: P<0.0001, ctrl-<br>UVRAG: P<0.0001, ctrl-Atg14:<br>P=1.0000, Atg6-UVRAG:<br>P=1.0000, Atg6-Atg14:<br>P<0.0001, UVRAG-Atg14:<br>P<0.0001 |
|                             | Atg6 RNAi        | 30 | 0.6510  | 1.0100 |          |                                                                                                                                                                            |
|                             | UVRAG RNAi       | 30 | 0.7843  | 0.9453 |          |                                                                                                                                                                            |
|                             | Atg14 RNAi       | 30 | 8.5140  | 4.2216 |          |                                                                                                                                                                            |
| Fig. 2f-h<br>Atg6,Clc       | control          | 30 | 7.5703  | 3.4941 | P=0.1761 | Mann-Whitney test                                                                                                                                                          |
|                             | Atg6 RNAi        | 30 | 6.2923  | 6.7276 |          |                                                                                                                                                                            |
| Fig. 2i,j<br>Atg6,Rab4      | control          | 30 | 9.6607  | 2.9445 | P<0.0001 | Wilcoxon's signed ranks test                                                                                                                                               |
|                             | Atg6 RNAi        | 30 | 29.9700 | 5.9617 |          |                                                                                                                                                                            |
| Fig. 2k,l<br>Atg6,Rab5      | control          | 30 | 9.1597  | 4.4263 | P<0.0001 | Wilcoxon's signed ranks test                                                                                                                                               |
|                             | Atg6 RNAi        | 30 | 22.5687 | 7.5319 |          |                                                                                                                                                                            |
| Fig. 2m,n<br>Atg6,Rab7      | control          | 30 | 7.4573  | 3.6079 | P<0.0001 | Wilcoxon's signed ranks test                                                                                                                                               |
|                             | Atg6 RNAi        | 30 | 20.3950 | 6.5058 |          |                                                                                                                                                                            |
| Fig. 2o,p<br>Atg6,Rab11     | control          | 30 | 0.6627  | 0.8570 | P=0.1494 | Wilcoxon's signed ranks test                                                                                                                                               |
|                             | Atg6 RNAi        | 30 | 1.8077  | 2.4607 |          |                                                                                                                                                                            |
| Fig. 2q,r<br>Atg6,Lamp1     | control          | 30 | 0.9523  | 1.0936 | P<0.0001 | Wilcoxon's signed ranks test                                                                                                                                               |
|                             | Atg6 RNAi        | 30 | 13.6137 | 7.4301 |          |                                                                                                                                                                            |
| Fig. 2s,t<br>Atg6,CathD     | control          | 30 | 3.1570  | 1.7227 | P<0.0001 | Wilcoxon's signed ranks test                                                                                                                                               |
|                             | Atg6 RNAi        | 30 | 15.3590 | 7.6345 |          |                                                                                                                                                                            |
| Fig. 2u,v<br>UVRAG,Lamp1    | control          | 30 | 0.5913  | 0.5869 | P<0.0001 | Wilcoxon's signed ranks test                                                                                                                                               |
|                             | UVRAG RNAi       | 30 | 6.8510  | 4.3742 |          |                                                                                                                                                                            |
| Fig. 2w,x<br>Atg14,Lamp1    | control          | 30 | 1.0047  | 0.6866 | P=0.4662 | Wilcoxon's signed ranks test                                                                                                                                               |
|                             | Atg14 RNAi       | 30 | 0.8627  | 0.7680 |          |                                                                                                                                                                            |
| Fig. 5e,f<br>Atg6,p62       | control          | 30 | 0.5380  | 0.1205 | P<0.0001 | Wilcoxon's signed ranks test                                                                                                                                               |
|                             | Atg6 RNAi        | 30 | 5.2780  | 0.2916 |          |                                                                                                                                                                            |
| Fig. 5g,h<br>Atg14,p62      | control          | 30 | 0.7723  | 0.1216 | P<0.0001 | Wilcoxon's signed ranks test                                                                                                                                               |
|                             | Atg14 RNAi       | 30 | 3.3040  | 0.2311 |          |                                                                                                                                                                            |
| Fig. 5i,j<br>UVRAG,p62      | control          | 30 | 0.8763  | 0.1612 | P=0.9658 | Wilcoxon's signed ranks test                                                                                                                                               |
|                             | UVRAG RNAi       | 30 | 0.9503  | 0.2771 |          |                                                                                                                                                                            |
| Fig. 6a,b<br>Atg6 null,NECD | control          | 25 | 1.9696  | 1.1696 | P<0.0001 | Wilcoxon's signed ranks test                                                                                                                                               |
|                             | Atg6 null mutant | 25 | 16.3632 | 3.3465 |          |                                                                                                                                                                            |
| Fig. 6c,d<br>Atg6,NECD      | control          | 20 | 0.6615  | 1.0481 | P=0.0001 | Wilcoxon's signed ranks test                                                                                                                                               |
|                             | Atg6 RNAi        | 20 | 14.7090 | 4.8574 |          |                                                                                                                                                                            |
| Fig. 6e,f<br>UVRAG,NECD     | control          | 20 | 1.0630  | 1.2620 | P=0.0001 | Wilcoxon's signed ranks test                                                                                                                                               |
|                             | UVRAG RNAi       | 20 | 12.6330 | 5.4172 |          |                                                                                                                                                                            |
| Fig. 6g,h<br>Atg14,NECD     | control          | 20 | 3.4385  | 3.2858 | P=0.0966 | Wilcoxon's signed ranks test                                                                                                                                               |
|                             | Atg14 RNAi       | 20 | 2.2240  | 1.9584 |          |                                                                                                                                                                            |
| Fig. S1a,b<br>Atg6,NICD     | control          | 20 | 0.5050  | 0.8977 | P=0.0001 | Wilcoxon's signed ranks test                                                                                                                                               |
|                             | Atg6 RNAi        | 20 | 17.2225 | 4.4057 |          |                                                                                                                                                                            |
| Fig. S1c,d<br>Atg6,Delta    | control          | 20 | 0.6775  | 1.0024 | P=0.0002 | Wilcoxon's signed ranks test                                                                                                                                               |
|                             | Atg6 RNAi        | 20 | 5.6810  | 4.4954 |          |                                                                                                                                                                            |

Table S4. Genotypes of the animals examined in this study.

| Figure            | Genotype                                                                                    |
|-------------------|---------------------------------------------------------------------------------------------|
| Fig. 1 Control    | +/+; tubGal4/+                                                                              |
| Fig. 1 Atg6 RNAi  | UAS-Dcr-2/+; tubGal4/UAS-Atg6-RNAi                                                          |
| Fig. 1 UVRAG RNAi | UAS-Dcr-2/+; tubGal4/UAS-UVRAG-RNAi                                                         |
| Fig. 1 Atg14 RNAi | UAS-Atg14-RNAi /+; tubGal4/+                                                                |
| Fig. 2a           | MsGal4/+; UAS-Dcr-2/UAS-GFP-2xFYVE; +/+                                                     |
| Fig. 2b           | MsGal4/+; UAS-Dcr-2/UAS-GFP-2xFYVE; UAS-Atg6-RNAi/+                                         |
| Fig. 2c           | MsGal4/+; UAS-Atg14-RNAi/UAS-GFP-2xFYVE,UAS-Dcr-2; +/+                                      |
| Fig. 2d           | MsGal4/+;UAS-GFP-2xFYVE/+; UAS-UVRAG-RNAi/+; +/+                                            |
| Fig. 2f           | MsGal4/+; UAS-Dcr-2/UAS-Clc-GFP;+/+                                                         |
| Fig. 2g           | MsGal4/+; UAS-Dcr-2/UAS-Clc-GFP; UAS-Atg6-RNAi/+                                            |
| Fig. 2i           | enGal4,RFP/UAS-Dcr-2; UAS-Atg6-RNAi/tubRab4-YFP                                             |
| Fig. 2k           | enGal4,RFP/UAS-Dcr-2; UAS-Atg6-RNAi/tubRab5-CFP                                             |
| Fig. 2m           | enGal4,RFP/UAS-Dcr-2; UAS-Atg6-RNAi/tubRab7-YFP                                             |
| Fig. 2o           | enGal4,RFP/UAS-Dcr-2; UAS-Atg6-RNAi/tubRab11-YFP                                            |
| Fig. 2q           | enGal4,RFP/tubLamp1-GFP; UAS-Atg6-RNAi/UAS-Dcr-2                                            |
| Fig. 2s           | UAS-Dcr-2/+; enGal4,UAS-EGFP/CathDmCherry; UAS-Atg6-RNAi/+                                  |
| Fig. 2u           | enGal4,RFP/tubLamp1-GFP; UAS-UVRAG-RNAi/UAS-Dcr-2                                           |
| Fig. 2w           | enGal4,RFP/tubLamp1-GFP,UAS-Atg14-RNAi; UAS-Dcr-2/+                                         |
| Fig. 3a           | MsGal4/+; UAS-Dcr-2/+; +/+                                                                  |
| Fig. 3b           | MsGal4/+; UAS-Dcr-2/+; UAS-Atg6-RNAi/+                                                      |
| Fig. 3c           | MsGal4/+; UAS-FLP/+; FRT82bAtg6 <sup>1</sup> /FRT82b,ubiGFP,Minute(RpS3 <sup>Plac92</sup> ) |
| Fig. 3d           | MsGal4/+; UAS-Dcr-2/+; UAS-Atg8a-RNAi/+                                                     |
| Fig. 3e           | MsGal4/+; UAS-Dcr-2/+; UAS-UVRAG-RNAi/+                                                     |
| Fig. 3f           | MsGal4/+; UAS-Dcr-2/UAS-Atg14-RNAi; +/+                                                     |
| Fig. 4a,b         | MsGal4/+; UAS-Dcr-2/UAS-Lamp1-GFP; UAS-Atg6-RNAi/+                                          |
| Fig. 4c           | MsGal4/+; UAS-Dcr-2/+; +/+                                                                  |
| Fig. 4d-f         | MsGal4/+; UAS-Dcr-2/+; UAS-Atg6-RNAi/+                                                      |
| Fig. 4g           | MsGal4/+; UAS-Dcr-2/UAS-HRP-CD2; +/+                                                        |
| Fig. 4h           | MsGal4/+; UAS-Dcr-2/UAS-Hrp-CD2; UAS-Atg6-RNAi/+                                            |
| Fig. 5a           | ptc-Gal4, UAS-mCherry-Atg8a, UAS-Myc/+; +/+                                                 |
| Fig. 5b           | ptc-Gal4, UAS-mCherry-Atg8a, UAS-Myc/+; UAS-Atg6-RNAi /+                                    |
| Fig. 5c           | ptc-Gal4, UAS-mCherry-Atg8a, UAS-Myc/ UAS-Atg14-RNAi; +/+                                   |
| Fig. 5d           | ptc-Gal4, UAS-mCherry-Atg8a, UAS-Myc/+; UAS-UVRAG-RNAi /+                                   |
| Fig. 5e           | UAS-Dcr-2/+; enGal4,UAS-EGFP/+; UAS-Atg6-RNAi/+                                             |
| Fig. 5g           | UAS-Dcr-2/+;enGal4,UAS-EGFP/UAS-Atg14-RNAi;+/+                                              |
| Fig. 5i           | UAS-Dcr-2/+; enGal4,UAS-EGFP/+; UAS-UVRAG-RNAi/+                                            |
| Fig. 6a           | hsFLP/+; +/+; FRT82bAtg61/FRT82b,ubiGFP                                                     |
| Fig. 6c           | UAS-Dcr-2/+; enGal4,UAS-EGFP/+;UAS-Atg6-RNAi/+                                              |
| Fig. 6e           | UAS-Dcr-2/+; enGal4,UAS-EGFP/+; UAS-UVRAG-RNAi/+                                            |
| Fig. 6g           | UAS-Dcr-2/+; enGal4,UAS-EGFP/UAS-Atg14-RNAi; +/+                                            |
| Fig. 6i           | enGal4/UAS-Lamp1-GFP; UAS-Atg6-RNAi/UAS-Dcr-2                                               |
| Fig. 7a           | UAS-Dcr-2/+; enGal4, UAS-myr-mRFP,NRE-EGFP/+; UAS-Atg6-RNAi/+                               |

|                |                                                                                                           |
|----------------|-----------------------------------------------------------------------------------------------------------|
| Fig. 7b        | UAS-Dcr-2/+; enGal4, UAS-myr-mRFP,NRE-EGFP/+; UAS-N/+                                                     |
| Fig. 7c        | enGa4,UAS-myr-mRFP,NRE-EGFP/UAS-Dcr-2;UAS-Atg6-RNAi/UAS-N                                                 |
| Fig. 7d        | UAS-Dcr-2/+;enGal4,UAS-myr-mRFP,NRE-EGFP/+; UAS-UVRAG-RNAi/+                                              |
| Fig. 7e        | UAS-Dcr-2/+; enGal4, UAS-myr-mRFP,NRE-EGFP/UAS-Atg14-RNAi; +/+                                            |
| Fig. 7f        | UAS-Dcr-2/+; enGal4, UAS-myr-mRFP,NRE-EGFP/+; +/+                                                         |
| Fig. 8a        | UAS-Dcr-2/+; enGal4,UAS-EGFP/+; UAS-Atg6-RNAi/+                                                           |
| Fig. 8b        | UAS-Dcr-2/+; enGal4,UAS-EGFP/+; UAS-UVRAG-RNAi/+                                                          |
| Fig. 8c        | UAS-Dcr-2/+;enGal4,UAS-EGFP/UAS-Atg14-RNAi;+/+                                                            |
| Fig. 9a,f      | MsGal4/+; UAS-Dcr-2/+; +/+                                                                                |
| Fig. 9b-d      | MsGal4/+; UAS-Dcr-2/+; UAS-Atg6-RNAi/+                                                                    |
| Fig. 9e        | MsGal4/+; UAS-Dcr-2/+; UAS-Vps15-RNAi/+                                                                   |
| Fig. 9g,h      | MsGal4/+; UAS-Dcr-2/+; UAS-UVRAG-RNAi/+                                                                   |
| Fig. 9i        | MsGal4/+; UAS-Dcr-2/UAS-Vps34-RNAi; +/+                                                                   |
| Fig. 9j        | MsGal4/+;UAS-Dcr-2/UAS-Atg14-RNAi;+/+                                                                     |
| Fig. 9k        | MsGal4/y; UAS-FLP/+; FRT82b,ry <sup>506</sup> /FRT82b,ubiGFP,Minute(RpS3 <sup>Plac92</sup> )              |
| Fig. 9l        | MsGal4/y; UAS-FLP/+; FRT82bAtg6 <sup>1</sup> /FRT82b,ubiGFP,Minute(RpS3 <sup>Plac92</sup> )               |
| Fig. 9m        | MsGal4/y; UAS-FLP/UAS-Atg6-myc;<br>FRT82bAtg6 <sup>1</sup> /FRT82b,ubiGFP,Minute(RpS3 <sup>Plac92</sup> ) |
| Fig. 10a-h     | UAS-Dcr-2/+; enGal4,UAS-EGFP/+; UAS-Atg6-RNAi/+                                                           |
| Fig. 11a,c,e,g | UAS-Dcr-2/+;enGal4,UAS-EGFP/UAS-Atg14-RNAi;+/+                                                            |
| Fig. 11b,d,f,h | UAS-Dcr-2/+; enGal4,UAS-EGFP/+; UAS-UVRAG-RNAi/+                                                          |
| Fig. S1a,c     | UAS-Dcr-2/+; enGal4,UAS-EGFP/+; UAS-Atg6-RNAi/+                                                           |
| Fig. S3a,e     | MsGal4/+; UAS-Dcr-2/+; +/+                                                                                |
| Fig. S3b,f     | MsGal4/+;UAS-Dcr-2/UAS-Atg14-RNAi;+/+                                                                     |
| Fig. S3c,g     | MsGal4/+; UAS-Dcr-2/+; UAS-Atg6-RNAi/+                                                                    |
| Fig. S3d,h     | MsGal4/+; UAS-Dcr-2/+; UAS-UVRAG-RNAi/+                                                                   |

Supplementary references:

1. Shravage BV, Hill JH, Powers CM, Wu L, Baehrecke EH: **Atg6 is required for multiple vesicle trafficking pathways and hematopoiesis in Drosophila**. *Development* 2013, **140**:1321–1329.
2. Wucherpennig T, Wilsch-Bräuninger M, González-Gaitán M: **Role of Drosophila Rab5 during endosomal trafficking at the synapse and evoked neurotransmitter release**. *The Journal of cell biology* 2003, **161**:609–624.
3. Marois E, Mahmoud A, Eaton S: **The endocytic pathway and formation of the Wingless morphogen gradient**. *Development* 2006, **133**:307–317.
4. Troost T, Jaekel S, Ohlenhard N, Klein T: **The tumour suppressor Lethal (2) giant discs is required for the function of the ESCRT-III component Shrub/CHMP4**. *Journal of cell science* 2012, **125**:763–776.
5. Pulipparacharuvil S, Akbar MA, Ray S, Sevrioukov EA, Haberman AS, Rohrer J, Krämer H: **Drosophila Vps16A is required for trafficking to lysosomes and biogenesis of pigment granules**. *Journal of cell*

*science* 2005, **118**:3663–3673.

6. Takáts S, Pircs K, Nagy P, Varga Á, Kárpáti M, Hegedűs K, Kramer H, Kovács AL, Sass M, Juhász G: **Interaction of the HOPS complex with Syntaxin 17 mediates autophagosome clearance in *Drosophila*.** *Molecular biology of the cell* 2014:mbc–E13.

7. Nagy P, Varga Á, Pircs K, Hegedűs K, Juhász G: **Myc-driven overgrowth requires unfolded protein response-mediated induction of autophagy and antioxidant responses in *Drosophila melanogaster*.** *PLoS genetics* 2013, **9**:e1003664.

8. Pircs K, Nagy P, Varga A, Venkei Z, Erdi B, Hegedus K, Juhasz G: **Advantages and limitations of different p62-based assays for estimating autophagic activity in *Drosophila*.** *PloS one* 2012, **7**:e44214.
